# Supplementary material for: Structural insights into self-assembly of a slow-evolving and mechanically robust supramolecular gel via time-resolved small-angle neutron scattering
Source: Royal Society of Chemistry journal article supplement (doi:10.1039/d2cp01826h), 2022-11-10
Supplement: d2cp01826h1.pdf [file d2cp01826h1.pdf]

Supporting Information for

**Time-lapse Structural Insights Into the Self-assembly Event in a Slow Evolving and Mechanically Robust Supramolecular Gel**

Marzieh Mirzamani,<sup>a</sup> ‡ Arnab Dawn,<sup>a</sup> ‡ Christopher J. Garvey<sup>b</sup>, Lilin He<sup>c</sup> Hilmar Koerner<sup>d</sup> and Harshita Kumari<sup>a\*</sup>

<sup>a</sup> James L. Winkle College of Pharmacy, University of Cincinnati, 231 Albert Sabin Way, Cincinnati, OH 45267-0004, USA

<sup>b</sup> Australian Nuclear Science and Technology Organisation, New Illawarra Rd, Lucas Heights, NSW, 2231, Australia.

<sup>c</sup> Neutron Scattering Division, Oak Ridge National Laboratory, 1 Bethel Valley Rd., Oak Ridge, TN 37831, USA.

<sup>d</sup> Materials & Manufacturing Directorate, Air Force Research Laboratory, WPAFB, OH 45433, USA.

‡ Contributed equally

**Materials and method**

1-(*N*-Boc-aminomethyl)-4-(aminomethyl)benzene, Benzyl isocyanate and silica gel were purchased from Sigma-Aldrich. Solvents were purchased from Fisher Scientific. DMSO-*d*<sub>6</sub> and CDCl<sub>3</sub> were purchased from Cambridge Isotope Laboratories.

NMR spectra were recorded in a Bruker AV 400 MHz spectrometer. The chemical shifts are expressed in parts per million ( $\delta$ , ppm).

ESI-MS was carried out in Orbitrap Fusion Lumos, from Thermo Scientific, San Jose California.

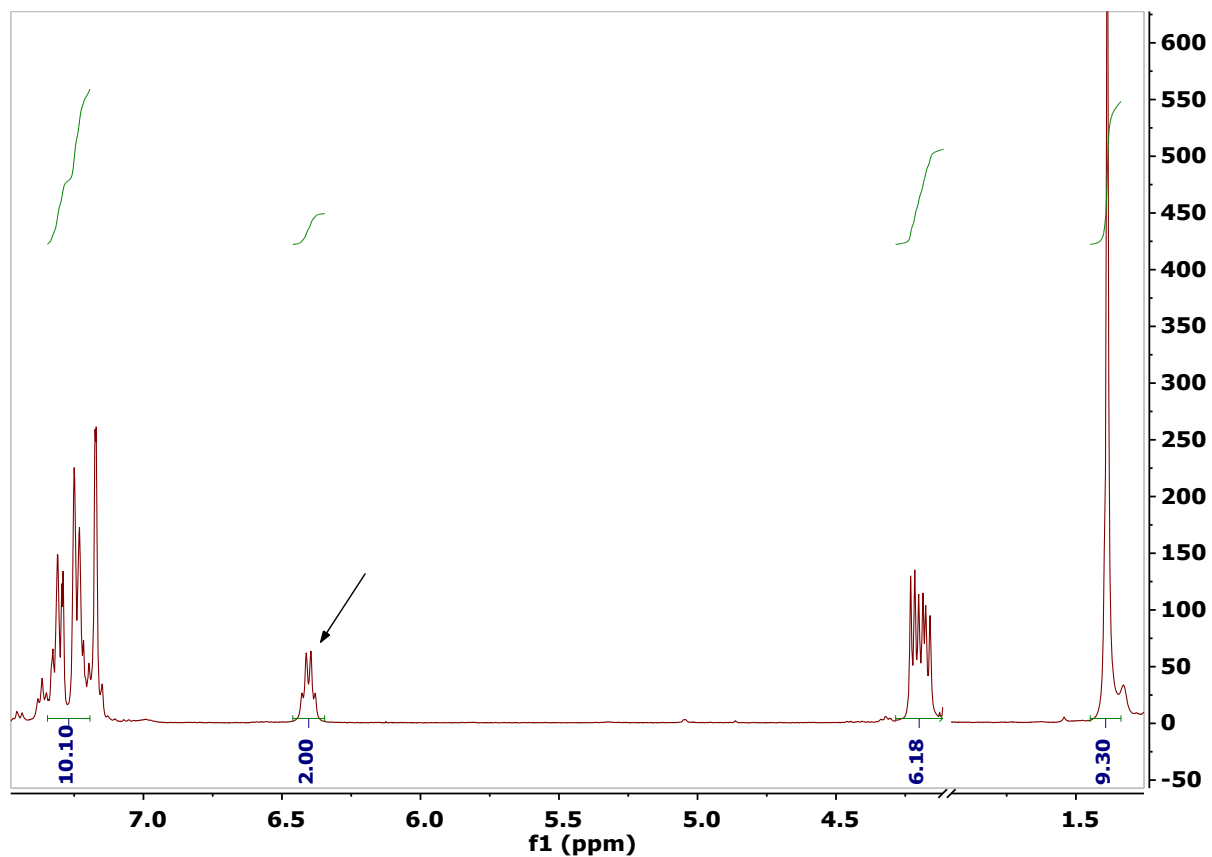

**Figure S1.**  $^1\text{H}$  NMR of **1** in  $\text{DMSO-d}_6$  (signal associated with the urea hydrogens are marked with arrow).

[GG 1] #118-188 RT: 0.28-0.65 AV: 71 NL: 6.43E9  
 F: FTMS + p ESI Full ms [150.0000-2000.0000]

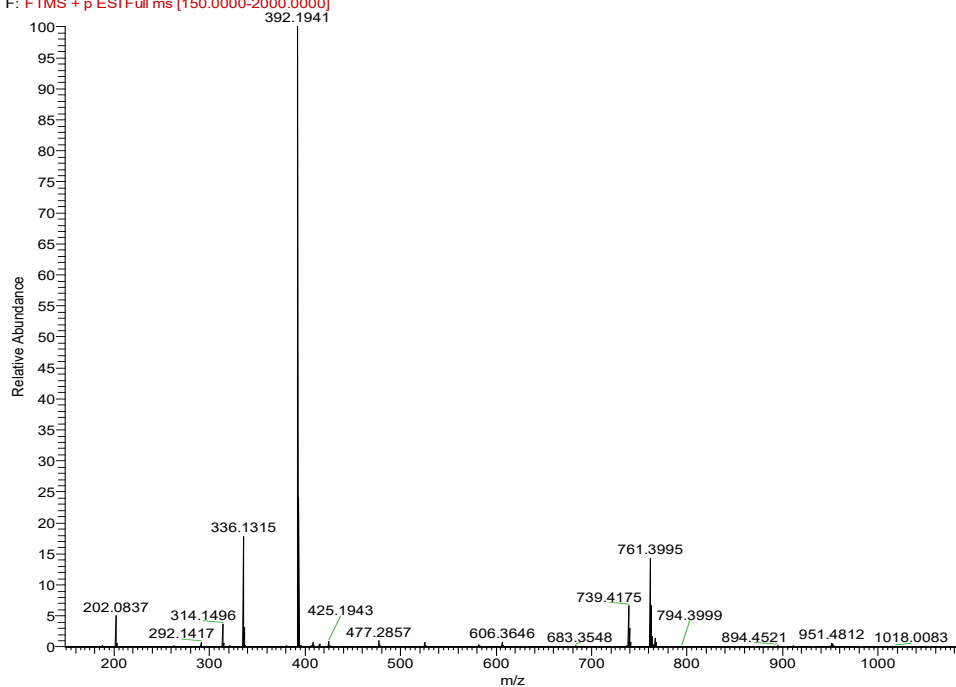

**Figure S2.** ESI mass spectra of **1**.

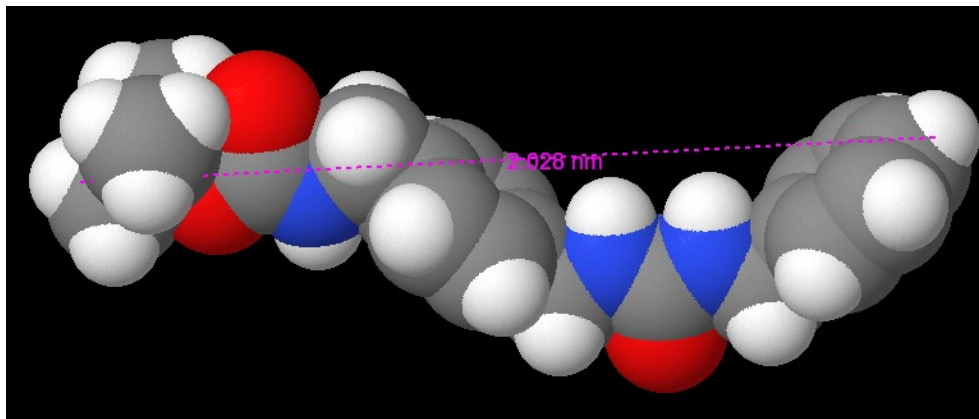

**Figure S3.** Molecular length based on hypothetically extended **1**, from molview.org.

## SANS Section

The scattering length density (SLD) of chloroform-D was calculated from its density and molecular formula using NIST's Neutron Activation and Scattering Calculator (<https://www.ncnr.nist.gov/resources/activation/>). The SLD of **1** was determined using the Contrast module of MULCh, available from the University of Sydney (<https://smb-research.smb.usyd.edu.au/NCVWeb/index.jsp>), which also calculated the density. Three hydrogens of **1** were assumed to be exchangeable for the contrast calculation. The molecular formulas, densities, and SLDs of **1** and chloroform-D are shown in the table below. A graph depicting the fractal dimension as a function of time, indicating the degree of self-similarity over long length scales, for the nonsonicated and sonicated gels is shown in Figure S4.

**Table S1:** Molecular formulas, densities, and SLDs of **1** and the solvent.

| Compound     | Molecular Formula                                | Density (g/mL) | SLD ( $\text{\AA}^{-2}$ ) |
|--------------|--------------------------------------------------|----------------|---------------------------|
| <b>1</b>     | $\text{C}_{21}\text{O}_3\text{N}_3\text{H}_{27}$ | 0.846          | $1.62\text{e-}6$          |
| Chloroform-D | $\text{CDCl}_3$                                  | 1.5            | $3.16\text{e-}6$          |

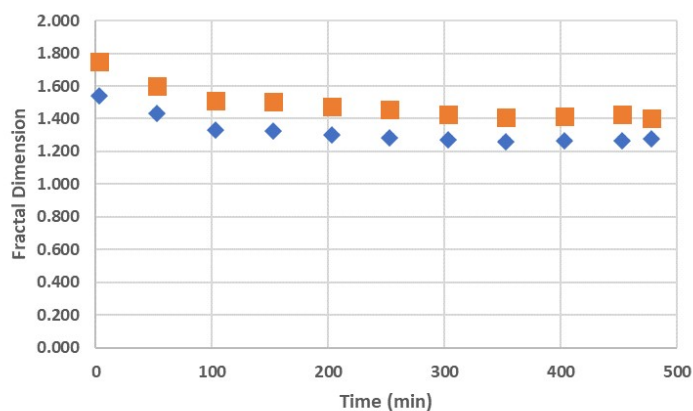

**Figure S4.** Fractal dimension (degree of self-similarity) of the nonsonicated (blue diamonds) and sonicated (orange squares) gels as a function of time, determined from the SANS data analysis using a smeared fractal core-shell cylinder model fit to the data.

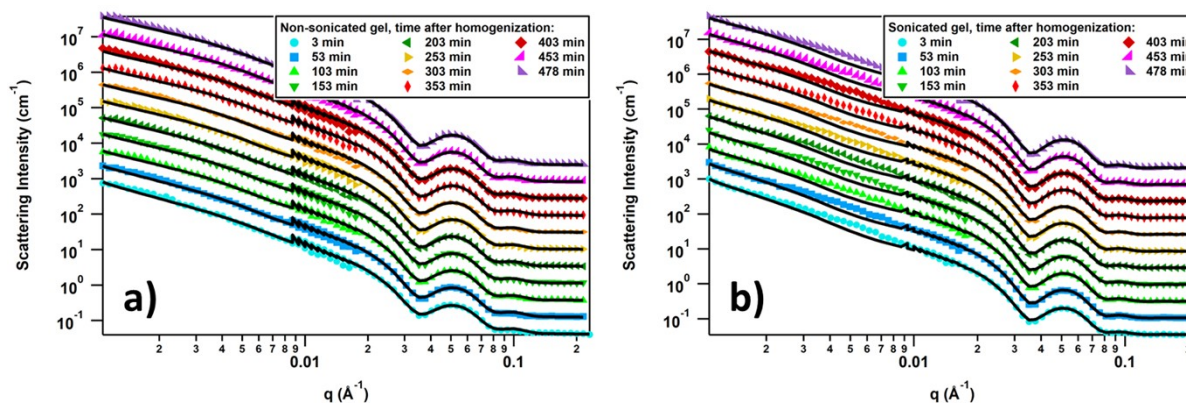

**Figure S5.** SANS curves of a) the nonsonicated gel and b) the sonicated gel of **1** in deuterated chloroform at a concentration of 2 w/v% showing the fits to the data over the full  $q$ -range using a fractal core-shell cylinder model (solid black lines). All curves are offset by powers of 3 for visual clarity. The oscillations in the fit curve in the overlap region ( $0.009 \text{ \AA}^{-1} < q < 0.017 \text{ \AA}^{-1}$ ) are caused by the model being smeared, resulting in the model alternating between fitting the low  $q$  points and the high  $q$  points.

## Non-sonicated Gel (3 min after homogenization)—Smearred Fractal Core-Shell Cylinder

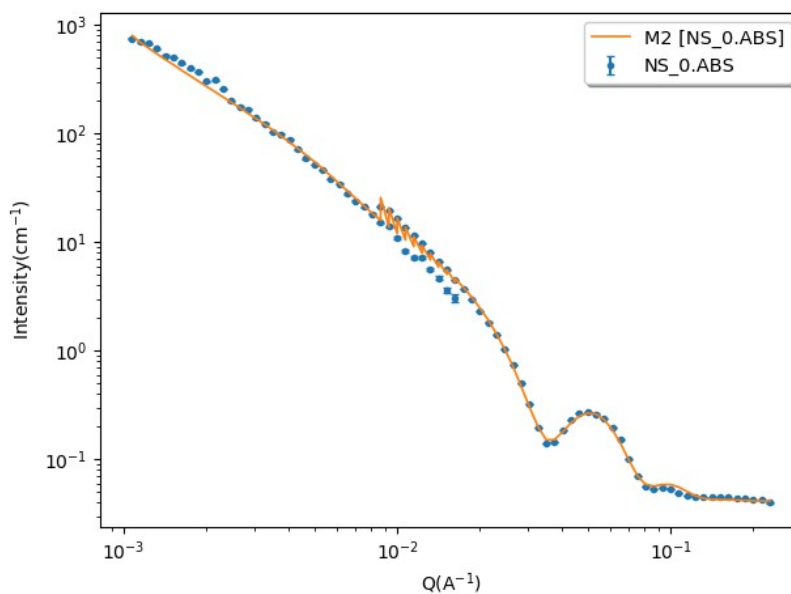

|                                |          |       |           |
|--------------------------------|----------|-------|-----------|
| Volume Fraction (scale)        | 0.0163   | ±     | 2.92E-05  |
| Background (cm <sup>-1</sup> ) | 0.040877 | ±     | 2.93E-05  |
| Core SLD (Å <sup>-2</sup> )    | 3.16E-06 | ±     | 0         |
| Shell SLD (Å <sup>-2</sup> )   | 1.62E-06 | ±     | 0         |
| Solvent SLD (Å <sup>-2</sup> ) | 3.16E-06 | ±     | 0         |
| Radius (Å)                     | 49.449   | ±     | 0.018798  |
| Thickness (Å)                  | 33.446   | ±     | 0.071014  |
| Thickness Polydispersity       | 0.35202  | ±     | 0.0018475 |
| Length (Å)                     | 880.25   | ±     | 1.2096    |
| Fractal Dimension              | 1.5475   | ±     | 0.0021275 |
| Fitting Range                  | 0.001072 | < q < | 0.231     |

## Non-sonicated Gel (53 min after homogenization)—Smearred Fractal Core-Shell Cylinder

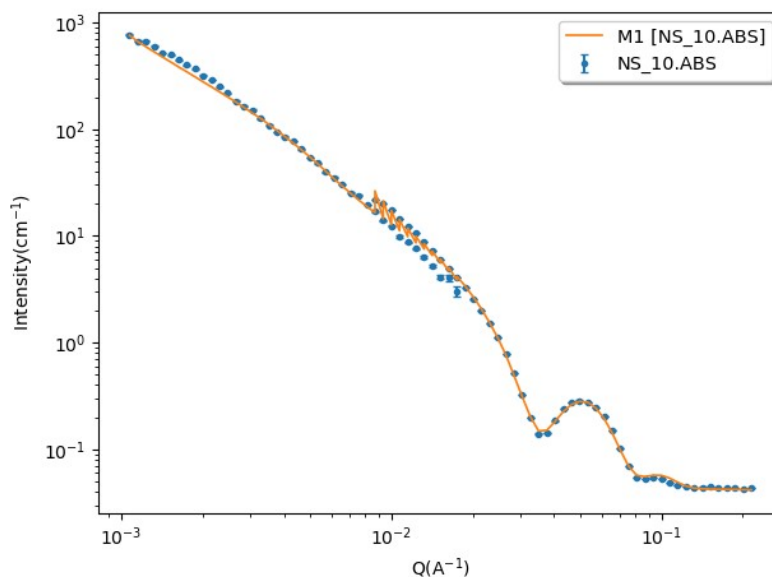

|                                |          |       |           |
|--------------------------------|----------|-------|-----------|
| Volume Fraction (scale)        | 0.015612 | ±     | 1.95E-05  |
| Background (cm <sup>-1</sup> ) | 0.041303 | ±     | 2.76E-05  |
| Core SLD (Å <sup>-2</sup> )    | 3.16E-06 | ±     | 0         |
| Shell SLD (Å <sup>-2</sup> )   | 1.62E-06 | ±     | 0         |
| Solvent SLD (Å <sup>-2</sup> ) | 3.16E-06 | ±     | 0         |
| Radius (Å)                     | 47.706   | ±     | 0.017626  |
| Thickness (Å)                  | 38.534   | ±     | 0.052674  |
| Thickness Polydispersity       | 0.26189  | ±     | 0.0011786 |
| Length (Å)                     | 1029.7   | ±     | 1.5199    |
| Fractal Dimension              | 1.4338   | ±     | 0.0022488 |
| Fitting Range                  | 0.001072 | < q < | 0.2154    |

## Non-sonicated Gel (103 min after homogenization)—Smearred Fractal Core-Shell Cylinder

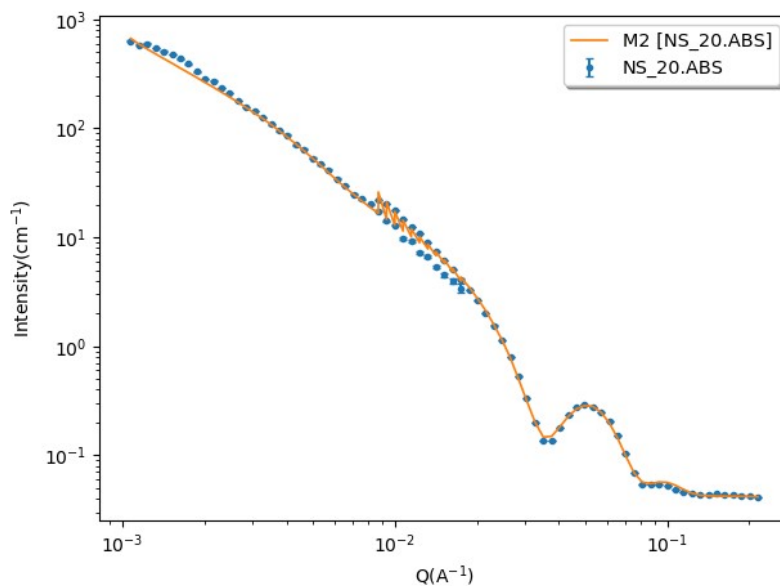

|                                |          |              |           |
|--------------------------------|----------|--------------|-----------|
| Volume Fraction (scale)        | 0.01555  | ±            | 1.76E-05  |
| Background (cm <sup>-1</sup> ) | 0.041165 | ±            | 2.71E-05  |
| Core SLD (Å <sup>-2</sup> )    | 3.16E-06 | ±            | 0         |
| Shell SLD (Å <sup>-2</sup> )   | 1.62E-06 | ±            | 0         |
| Solvent SLD (Å <sup>-2</sup> ) | 3.16E-06 | ±            | 0         |
| Radius (Å)                     | 47.149   | ±            | 0.016934  |
| Thickness (Å)                  | 39.826   | ±            | 0.048796  |
| Thickness Polydispersity       | 0.24069  | ±            | 0.0010637 |
| Length (Å)                     | 1116.2   | ±            | 1.7413    |
| Fractal Dimension              | 1.3308   | ±            | 0.0024375 |
| Fitting Range                  | 0.001072 | < <i>q</i> < | 0.2154    |



## Non-sonicated Gel (153 min after homogenization)—Smearred Fractal Core-Shell Cylinder

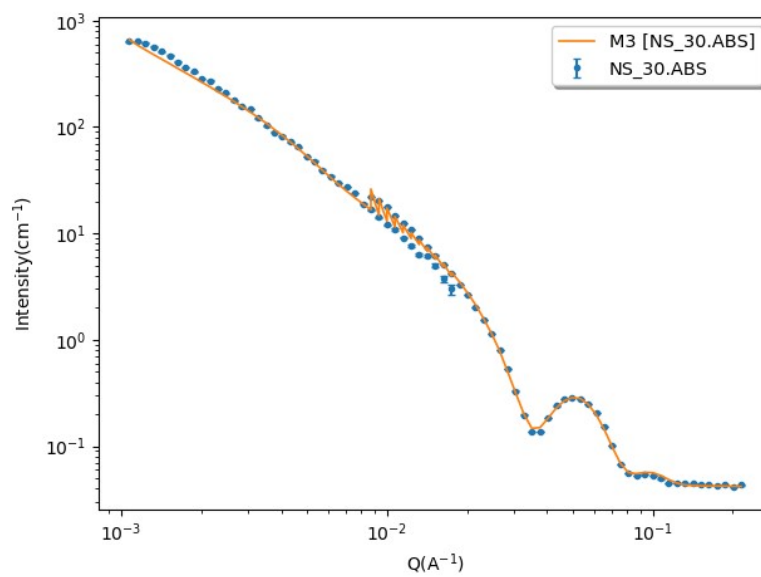

|                                |          |              |           |
|--------------------------------|----------|--------------|-----------|
| Volume Fraction (scale)        | 0.015465 | ±            | 1.72E-05  |
| Background (cm <sup>-1</sup> ) | 0.041428 | ±            | 2.70E-05  |
| Core SLD (Å <sup>-2</sup> )    | 3.16E-06 | ±            | 0         |
| Shell SLD (Å <sup>-2</sup> )   | 1.62E-06 | ±            | 0         |
| Solvent SLD (Å <sup>-2</sup> ) | 3.16E-06 | ±            | 0         |
| Radius (Å)                     | 47.047   | ±            | 0.017005  |
| Thickness (Å)                  | 40.158   | ±            | 0.048389  |
| Thickness Polydispersity       | 0.23731  | ±            | 0.0010445 |
| Length (Å)                     | 1113.1   | ±            | 1.7362    |
| Fractal Dimension              | 1.3241   | ±            | 0.0024344 |
| Fitting Range                  | 0.001072 | < <i>q</i> < | 0.2154    |

## Non-sonicated Gel (203 min after homogenization)—Smearred Fractal Core-Shell Cylinder

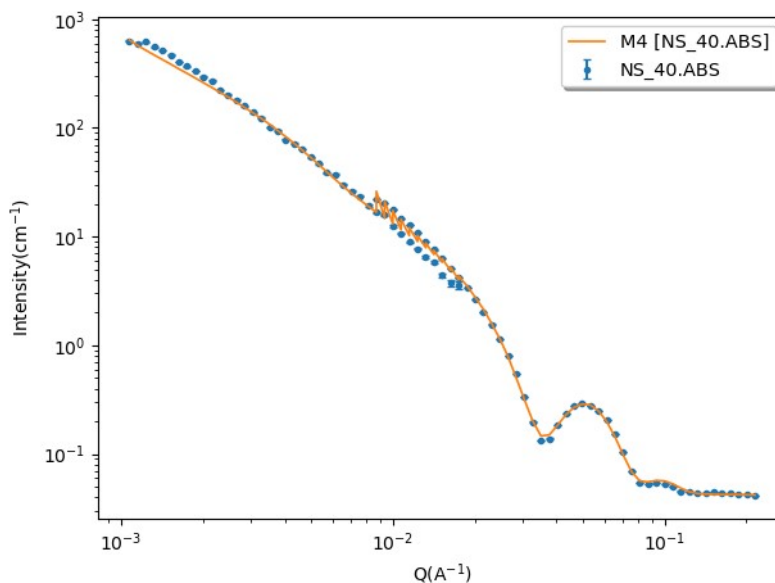

|                                |          |              |           |
|--------------------------------|----------|--------------|-----------|
| Volume Fraction (scale)        | 0.015422 | ±            | 1.65E-05  |
| Background (cm <sup>-1</sup> ) | 0.041502 | ±            | 2.70E-05  |
| Core SLD (Å <sup>-2</sup> )    | 3.16E-06 | ±            | 0         |
| Shell SLD (Å <sup>-2</sup> )   | 1.62E-06 | ±            | 0         |
| Solvent SLD (Å <sup>-2</sup> ) | 3.16E-06 | ±            | 0         |
| Radius (Å)                     | 47.009   | ±            | 0.016561  |
| Thickness (Å)                  | 40.495   | ±            | 0.046174  |
| Thickness Polydispersity       | 0.22945  | ±            | 0.0010156 |
| Length (Å)                     | 1121.2   | ±            | 1.7749    |
| Fractal Dimension              | 1.3014   | ±            | 0.002477  |
| Fitting Range                  | 0.001072 | < <i>q</i> < | 0.2154    |

## Non-sonicated Gel (253 min after homogenization)—Smearred Fractal Core-Shell Cylinder

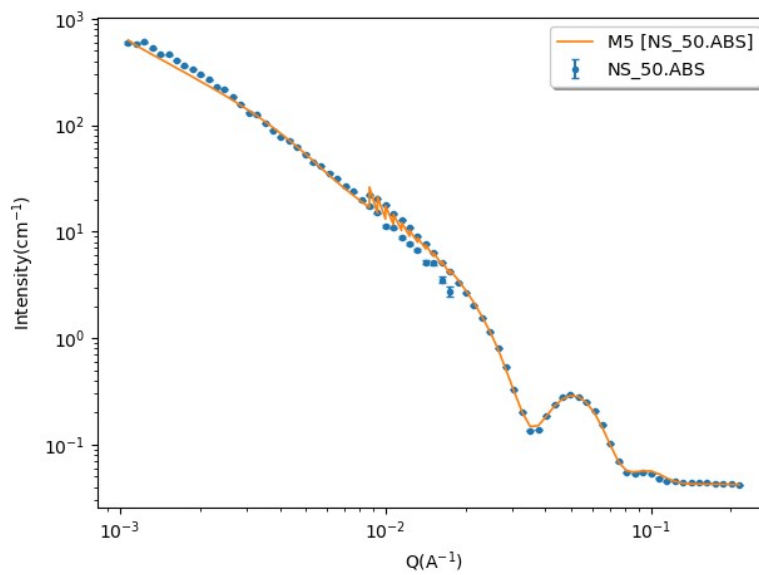

|                                |          |              |           |
|--------------------------------|----------|--------------|-----------|
| Volume Fraction (scale)        | 0.015391 | ±            | 1.65E-05  |
| Background (cm <sup>-1</sup> ) | 0.041562 | ±            | 2.69E-05  |
| Core SLD (Å <sup>-2</sup> )    | 3.16E-06 | ±            | 0         |
| Shell SLD (Å <sup>-2</sup> )   | 1.62E-06 | ±            | 0         |
| Solvent SLD (Å <sup>-2</sup> ) | 3.16E-06 | ±            | 0         |
| Radius (Å)                     | 46.909   | ±            | 0.01677   |
| Thickness (Å)                  | 40.603   | ±            | 0.047062  |
| Thickness Polydispersity       | 0.23298  | ±            | 0.0010179 |
| Length (Å)                     | 1116.7   | ±            | 1.7653    |
| Fractal Dimension              | 1.2841   | ±            | 0.0024847 |
| Fitting Range                  | 0.001072 | < <i>q</i> < | 0.2154    |

## Non-sonicated Gel (303 min after homogenization)—Smearred Fractal Core-Shell Cylinder

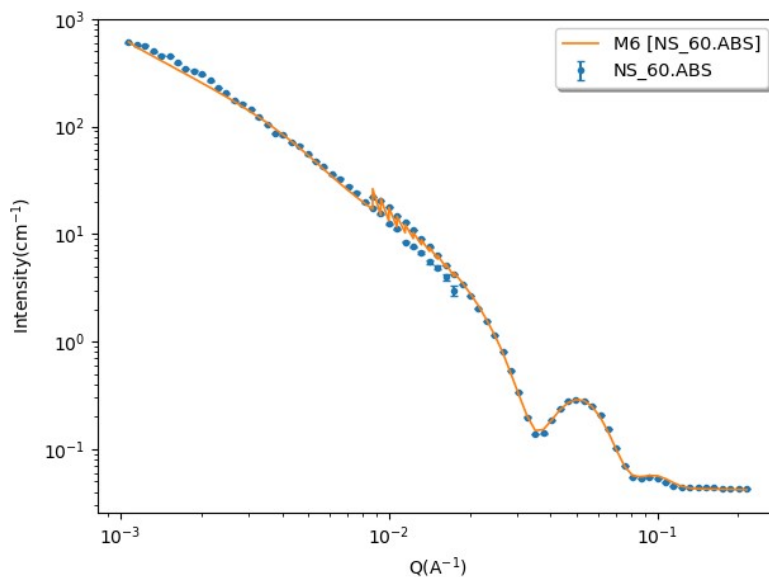

|                                |          |         |           |
|--------------------------------|----------|---------|-----------|
| Volume Fraction (scale)        | 0.015512 | ±       | 1.70E-05  |
| Background (cm <sup>-1</sup> ) | 0.041485 | ±       | 2.71E-05  |
| Core SLD (Å <sup>-2</sup> )    | 3.16E-06 | ±       | 0         |
| Shell SLD (Å <sup>-2</sup> )   | 1.62E-06 | ±       | 0         |
| Solvent SLD (Å <sup>-2</sup> ) | 3.16E-06 | ±       | 0         |
| Radius (Å)                     | 47.006   | ±       | 0.017314  |
| Thickness (Å)                  | 40.272   | ±       | 0.047951  |
| Thickness Polydispersity       | 0.24005  | ±       | 0.0010264 |
| Length (Å)                     | 1100.5   | ±       | 1.8232    |
| Fractal Dimension              | 1.2696   | ±       | 0.0024814 |
| Fitting Range                  | 0.001072 | < $q$ < | 0.2154    |

## Non-sonicated Gel (353 min after homogenization)—Smearred Fractal Core-Shell Cylinder

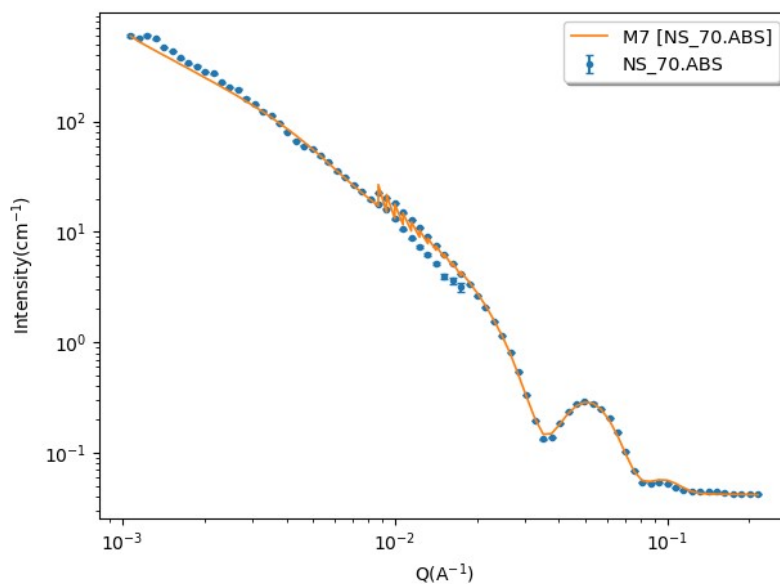

|                                |          |         |           |
|--------------------------------|----------|---------|-----------|
| Volume Fraction (scale)        | 0.015382 | ±       | 1.66E-05  |
| Background (cm <sup>-1</sup> ) | 0.041489 | ±       | 2.70E-05  |
| Core SLD (Å <sup>-2</sup> )    | 3.16E-06 | ±       | 0         |
| Shell SLD (Å <sup>-2</sup> )   | 1.62E-06 | ±       | 0         |
| Solvent SLD (Å <sup>-2</sup> ) | 3.16E-06 | ±       | 0         |
| Radius (Å)                     | 47.178   | ±       | 0.01708   |
| Thickness (Å)                  | 40.372   | ±       | 0.046118  |
| Thickness Polydispersity       | 0.22454  | ±       | 0.0010186 |
| Length (Å)                     | 1031     | ±       | 1.5316    |
| Fractal Dimension              | 1.2612   | ±       | 0.0024279 |
| Fitting Range                  | 0.001072 | < $q$ < | 0.2154    |

## Non-sonicated Gel (403 min after homogenization)—Smearred Fractal Core-Shell Cylinder

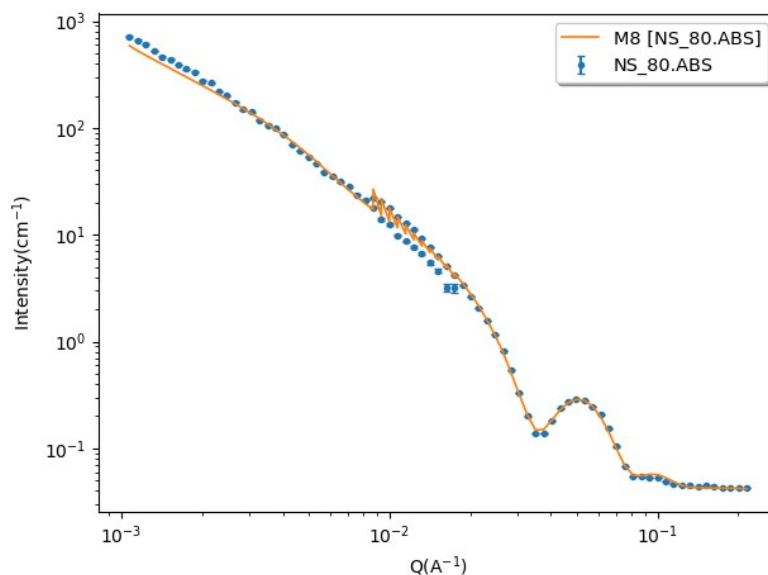

|                                |          |              |           |
|--------------------------------|----------|--------------|-----------|
| Volume Fraction (scale)        | 0.015391 | ±            | 1.67E-05  |
| Background (cm <sup>-1</sup> ) | 0.041542 | ±            | 2.70E-05  |
| Core SLD (Å <sup>-2</sup> )    | 3.16E-06 | ±            | 0         |
| Shell SLD (Å <sup>-2</sup> )   | 1.62E-06 | ±            | 0         |
| Solvent SLD (Å <sup>-2</sup> ) | 3.16E-06 | ±            | 0         |
| Radius (Å)                     | 47.144   | ±            | 0.017151  |
| Thickness (Å)                  | 40.314   | ±            | 0.046713  |
| Thickness Polydispersity       | 0.22879  | ±            | 0.001026  |
| Length (Å)                     | 1029.5   | ±            | 1.5412    |
| Fractal Dimension              | 1.2643   | ±            | 0.0024316 |
| Fitting Range                  | 0.001072 | < <i>q</i> < | 0.2154    |

## Non-sonicated Gel (453 min after homogenization)—Smearred Fractal Core-Shell Cylinder

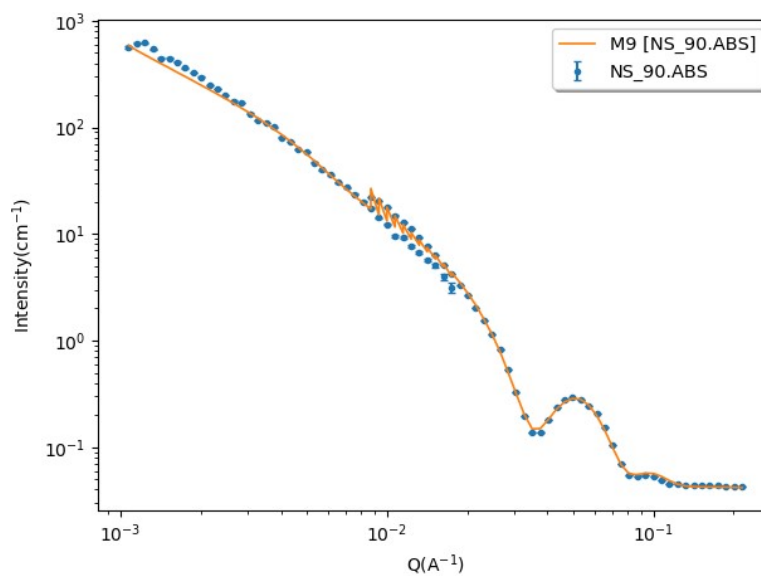

|                                |          |         |           |
|--------------------------------|----------|---------|-----------|
| Volume Fraction (scale)        | 0.015438 | ±       | 1.70E-05  |
| Background (cm <sup>-1</sup> ) | 0.041443 | ±       | 2.70E-05  |
| Core SLD (Å <sup>-2</sup> )    | 3.16E-06 | ±       | 0         |
| Shell SLD (Å <sup>-2</sup> )   | 1.62E-06 | ±       | 0         |
| Solvent SLD (Å <sup>-2</sup> ) | 3.16E-06 | ±       | 0         |
| Radius (Å)                     | 47.163   | ±       | 0.0172    |
| Thickness (Å)                  | 40.131   | ±       | 0.047053  |
| Thickness Polydispersity       | 0.23019  | ±       | 0.0010343 |
| Length (Å)                     | 1028.9   | ±       | 1.5451    |
| Fractal Dimension              | 1.2645   | ±       | 0.0024321 |
| Fitting Range                  | 0.001072 | < $q$ < | 0.2154    |

## Non-sonicated Gel (478 min after homogenization)—Smearred Fractal Core-Shell Cylinder

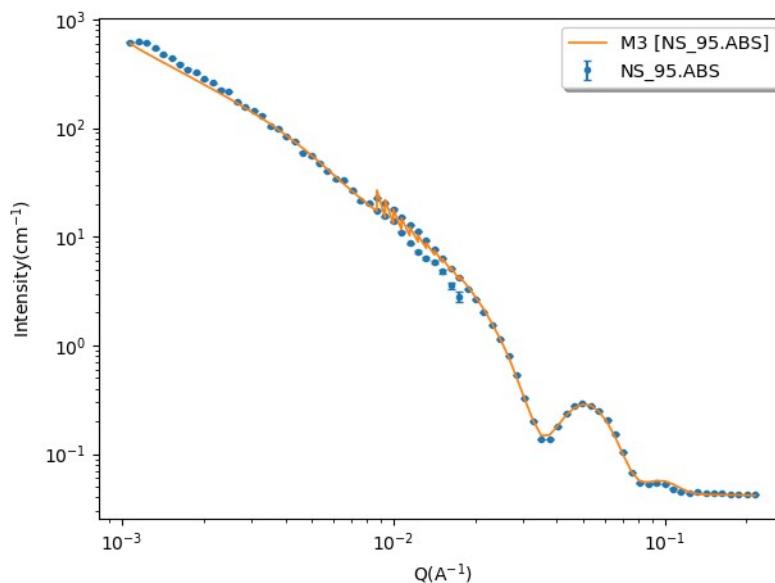

|                                |          |       |           |
|--------------------------------|----------|-------|-----------|
| Volume Fraction (scale)        | 0.015384 | ±     | 1.68E-05  |
| Background (cm <sup>-1</sup> ) | 0.041311 | ±     | 2.70E-05  |
| Core SLD (Å <sup>-2</sup> )    | 3.16E-06 | ±     | 0         |
| Shell SLD (Å <sup>-2</sup> )   | 1.62E-06 | ±     | 0         |
| Solvent SLD (Å <sup>-2</sup> ) | 3.16E-06 | ±     | 0         |
| Radius (Å)                     | 47.141   | ±     | 0.017215  |
| Thickness (Å)                  | 40.247   | ±     | 0.047032  |
| Thickness Polydispersity       | 0.23014  | ±     | 0.0010294 |
| Length (Å)                     | 1026.3   | ±     | 1.5496    |
| Fractal Dimension              | 1.2749   | ±     | 0.0024069 |
| Fitting Range                  | 0.001072 | < q < | 0.2154    |



### Sonicated Gel (3 min after homogenization)— Smearred Fractal Core-Shell Cylinder

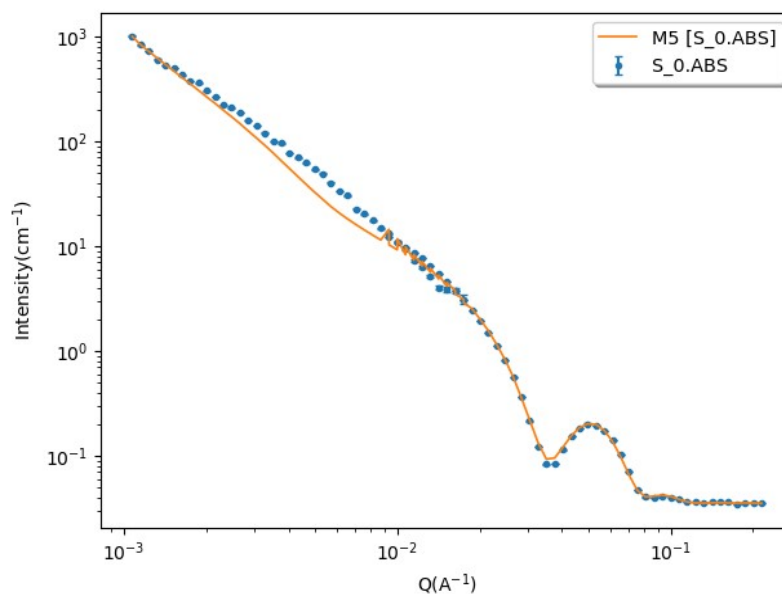

|                                |           |              |           |
|--------------------------------|-----------|--------------|-----------|
| Volume Fraction (scale)        | 0.0091526 | ±            | 7.57E-06  |
| Background (cm <sup>-1</sup> ) | 0.034888  | ±            | 2.25E-05  |
| Core SLD (Å <sup>-2</sup> )    | 3.16E-06  | ±            | 0         |
| Shell SLD (Å <sup>-2</sup> )   | 1.62E-06  | ±            | 0         |
| Solvent SLD (Å <sup>-2</sup> ) | 3.16E-06  | ±            | 0         |
| Radius (Å)                     | 43.253    | ±            | 0.019331  |
| Thickness (Å)                  | 49.357    | ±            | 0.039112  |
| Thickness Polydispersity       | 0.091155  | ±            | 0.0012627 |
| Length (Å)                     | 1391.3    | ±            | 3.4947    |
| Fractal Dimension              | 1.7541    | ±            | 0.0028381 |
| Fitting Range                  | 0.001072  | < <i>q</i> < | 0.2154    |

## Sonicated Gel (53 min after homogenization)— Smearred Fractal Core-Shell Cylinder

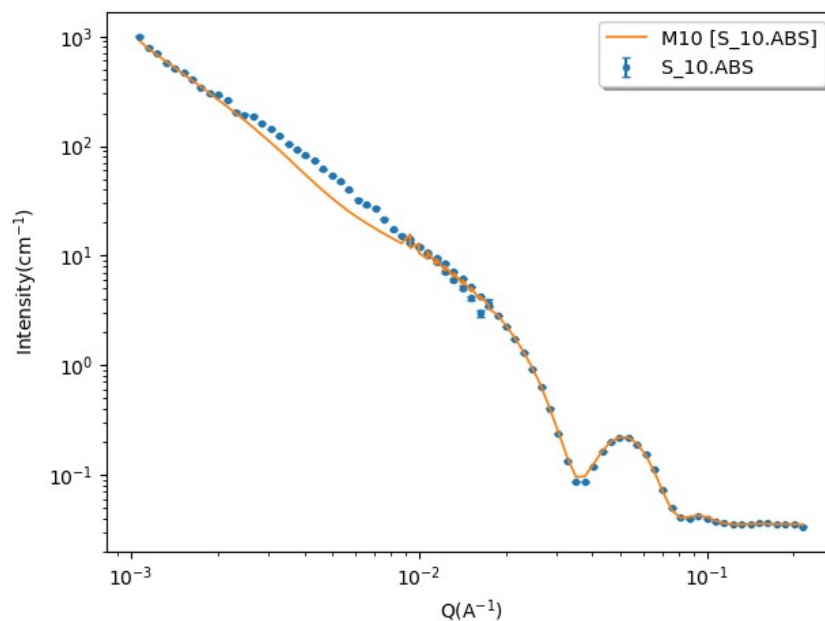

|                                |          |       |           |
|--------------------------------|----------|-------|-----------|
| Volume Fraction (scale)        | 0.010202 | ±     | 7.46E-06  |
| Background (cm <sup>-1</sup> ) | 0.034661 | ±     | 2.27E-05  |
| Core SLD (Å <sup>-2</sup> )    | 3.16E-06 | ±     | 0         |
| Shell SLD (Å <sup>-2</sup> )   | 1.62E-06 | ±     | 0         |
| Solvent SLD (Å <sup>-2</sup> ) | 3.16E-06 | ±     | 0         |
| Radius (Å)                     | 42.479   | ±     | 0.020146  |
| Thickness (Å)                  | 50.245   | ±     | 0.035216  |
| Thickness Polydispersity       | 0.060529 | ±     | 0.0015919 |
| Length (Å)                     | 1585.4   | ±     | 4.1302    |
| Fractal Dimension              | 1.6088   | ±     | 0.002997  |
| Fitting Range                  | 0.001072 | < q < | 0.2154    |

## Sonicated Gel (103 min after homogenization)— Smearred Fractal Core-Shell Cylinder

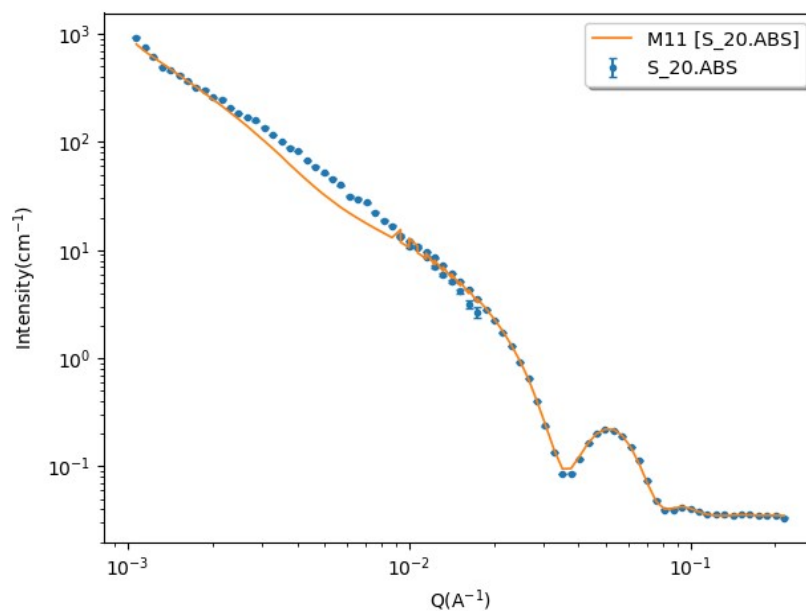

|                                   |          |         |           |
|-----------------------------------|----------|---------|-----------|
| Volume Fraction (scale)           | 0.010225 | $\pm$   | 7.31E-06  |
| Background ( $\text{cm}^{-1}$ )   | 0.034648 | $\pm$   | 2.23E-05  |
| Core SLD ( $\text{\AA}^{-2}$ )    | 3.16E-06 | $\pm$   | 0         |
| Shell SLD ( $\text{\AA}^{-2}$ )   | 1.62E-06 | $\pm$   | 0         |
| Solvent SLD ( $\text{\AA}^{-2}$ ) | 3.16E-06 | $\pm$   | 0         |
| Radius ( $\text{\AA}$ )           | 42.373   | $\pm$   | 0.016559  |
| Thickness ( $\text{\AA}$ )        | 50.415   | $\pm$   | 0.033041  |
| Thickness Polydispersity          | 0.058014 | $\pm$   | 0.0014928 |
| Length ( $\text{\AA}$ )           | 1668.7   | $\pm$   | 4.6195    |
| Fractal Dimension                 | 1.5151   | $\pm$   | 0.0031924 |
| Fitting Range                     | 0.001072 | $< q <$ | 0.2154    |

## Sonicated Gel (153 min after homogenization)—Smeared Fractal Core-Shell Cylinder

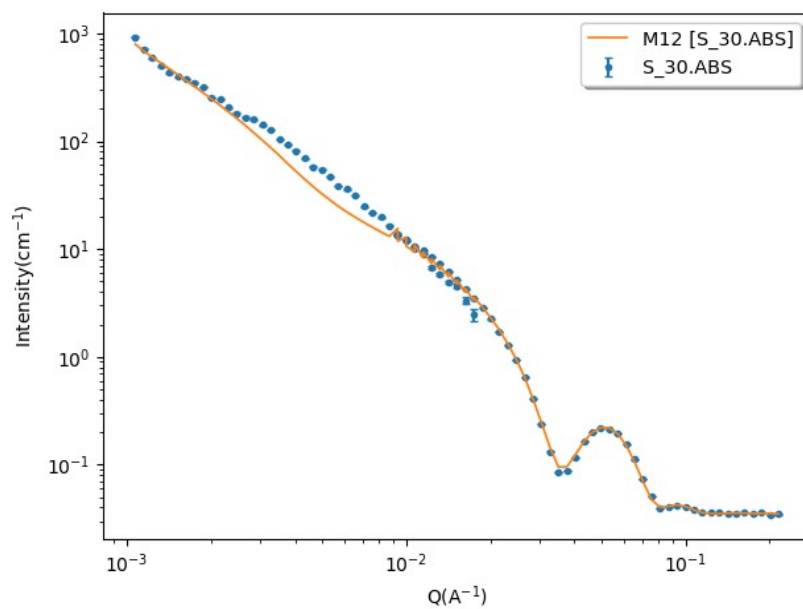

|                                |          |              |           |
|--------------------------------|----------|--------------|-----------|
| Volume Fraction (scale)        | 0.010275 | ±            | 7.34E-06  |
| Background (cm <sup>-1</sup> ) | 0.034686 | ±            | 2.23E-05  |
| Core SLD (Å <sup>-2</sup> )    | 3.16E-06 | ±            | 0         |
| Shell SLD (Å <sup>-2</sup> )   | 1.62E-06 | ±            | 0         |
| Solvent SLD (Å <sup>-2</sup> ) | 3.16E-06 | ±            | 0         |
| Radius (Å)                     | 42.334   | ±            | 0.016494  |
| Thickness (Å)                  | 50.362   | ±            | 0.032984  |
| Thickness Polydispersity       | 0.059662 | ±            | 0.0014556 |
| Length (Å)                     | 1668.5   | ±            | 4.6256    |
| Fractal Dimension              | 1.5077   | ±            | 0.003187  |
| Fitting Range                  | 0.001072 | < <i>q</i> < | 0.2154    |

## Sonicated Gel (203 min after homogenization)—Smeared Fractal Core-Shell Cylinder

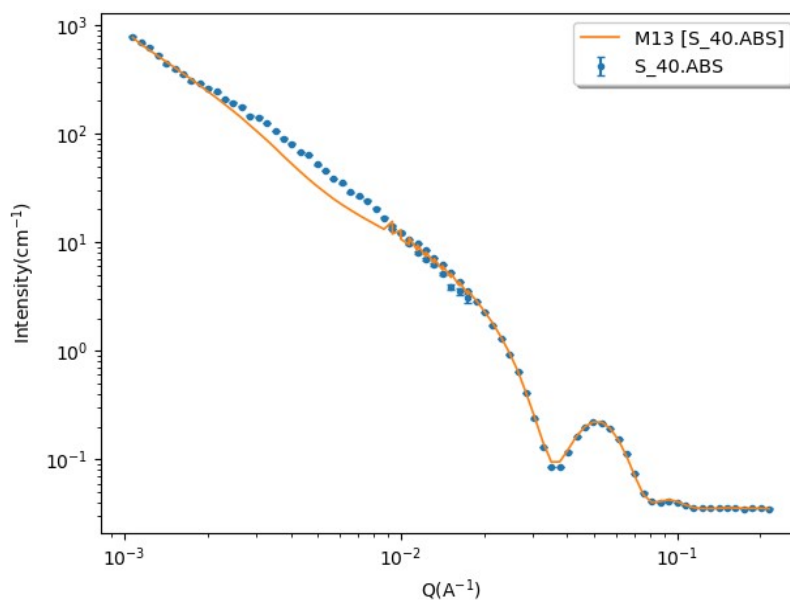

|                                |          |              |           |
|--------------------------------|----------|--------------|-----------|
| Volume Fraction (scale)        | 0.01026  | ±            | 7.20E-06  |
| Background (cm <sup>-1</sup> ) | 0.034939 | ±            | 2.23E-05  |
| Core SLD (Å <sup>-2</sup> )    | 3.16E-06 | ±            | 0         |
| Shell SLD (Å <sup>-2</sup> )   | 1.62E-06 | ±            | 0         |
| Solvent SLD (Å <sup>-2</sup> ) | 3.16E-06 | ±            | 0         |
| Radius (Å)                     | 42.297   | ±            | 0.017078  |
| Thickness (Å)                  | 50.515   | ±            | 0.033174  |
| Thickness Polydispersity       | 0.05114  | ±            | 0.0016694 |
| Length (Å)                     | 1673.7   | ±            | 4.7483    |
| Fractal Dimension              | 1.4752   | ±            | 0.0032348 |
| Fitting Range                  | 0.001072 | < <i>q</i> < | 0.2154    |

## Sonicated Gel (253 min after homogenization)— Smearred Fractal Core-Shell Cylinder

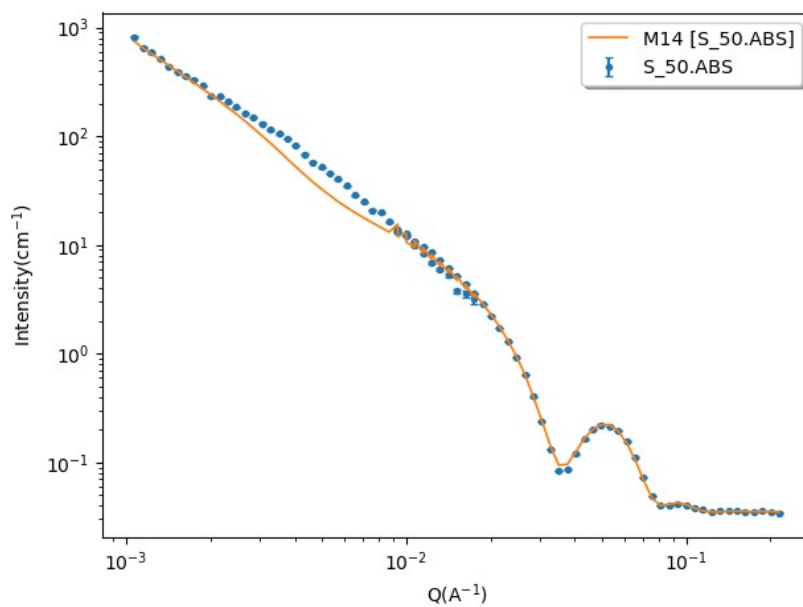

|                                   |          |         |           |
|-----------------------------------|----------|---------|-----------|
| Volume Fraction (scale)           | 0.010285 | $\pm$   | 7.20E-06  |
| Background ( $\text{cm}^{-1}$ )   | 0.034727 | $\pm$   | 2.23E-05  |
| Core SLD ( $\text{\AA}^{-2}$ )    | 3.16E-06 | $\pm$   | 0         |
| Shell SLD ( $\text{\AA}^{-2}$ )   | 1.62E-06 | $\pm$   | 0         |
| Solvent SLD ( $\text{\AA}^{-2}$ ) | 3.16E-06 | $\pm$   | 0         |
| Radius ( $\text{\AA}$ )           | 42.48    | $\pm$   | 0.017546  |
| Thickness ( $\text{\AA}$ )        | 50.459   | $\pm$   | 0.033381  |
| Thickness Polydispersity          | 0.049631 | $\pm$   | 0.0017297 |
| Length ( $\text{\AA}$ )           | 1677.2   | $\pm$   | 4.8164    |
| Fractal Dimension                 | 1.4578   | $\pm$   | 0.0032725 |
| Fitting Range                     | 0.001072 | $< q <$ | 0.2154    |

## Sonicated Gel (303 min after homogenization)— Smearred Fractal Core-Shell Cylinder

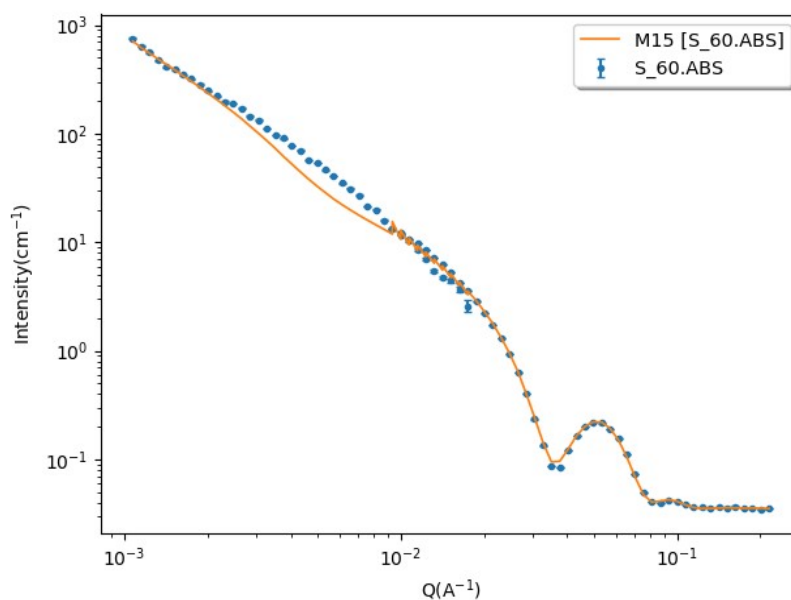

|                                |          |         |           |
|--------------------------------|----------|---------|-----------|
| Volume Fraction (scale)        | 0.010245 | ±       | 7.35E-06  |
| Background (cm <sup>-1</sup> ) | 0.034981 | ±       | 2.24E-05  |
| Core SLD (Å <sup>-2</sup> )    | 3.16E-06 | ±       | 0         |
| Shell SLD (Å <sup>-2</sup> )   | 1.62E-06 | ±       | 0         |
| Solvent SLD (Å <sup>-2</sup> ) | 3.16E-06 | ±       | 0         |
| Radius (Å)                     | 42.399   | ±       | 0.016409  |
| Thickness (Å)                  | 50.503   | ±       | 0.032807  |
| Thickness Polydispersity       | 0.055041 | ±       | 0.0015583 |
| Length (Å)                     | 1666.4   | ±       | 4.694     |
| Fractal Dimension              | 1.4289   | ±       | 0.0032894 |
| Fitting Range                  | 0.001072 | < $q$ < | 0.2154    |

## Sonicated Gel (353 min after homogenization)— Smearred Fractal Core-Shell Cylinder

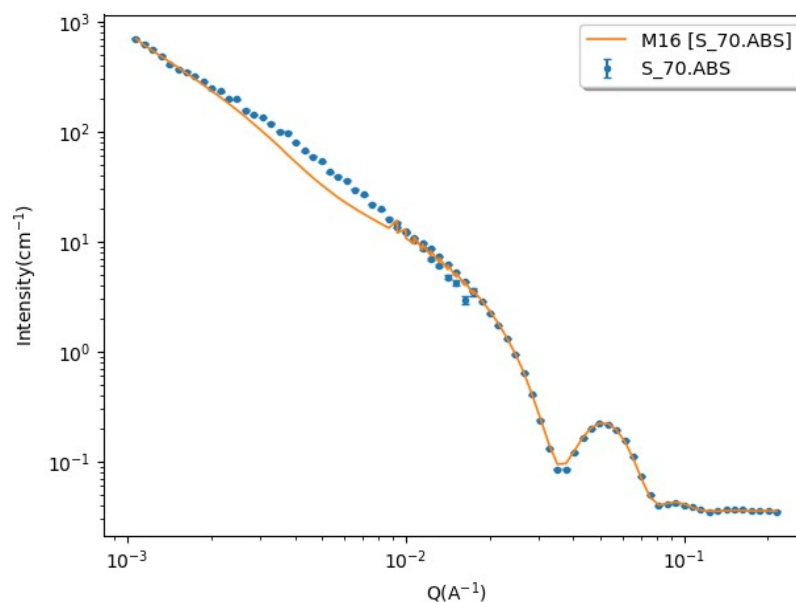

|                                   |          |         |           |
|-----------------------------------|----------|---------|-----------|
| Volume Fraction (scale)           | 0.010238 | $\pm$   | 7.11E-06  |
| Background ( $\text{cm}^{-1}$ )   | 0.034931 | $\pm$   | 2.23E-05  |
| Core SLD ( $\text{\AA}^{-2}$ )    | 3.16E-06 | $\pm$   | 0         |
| Shell SLD ( $\text{\AA}^{-2}$ )   | 1.62E-06 | $\pm$   | 0         |
| Solvent SLD ( $\text{\AA}^{-2}$ ) | 3.16E-06 | $\pm$   | 0         |
| Radius ( $\text{\AA}$ )           | 42.302   | $\pm$   | 0.018695  |
| Thickness ( $\text{\AA}$ )        | 50.688   | $\pm$   | 0.033681  |
| Thickness Polydispersity          | 0.045606 | $\pm$   | 0.0019032 |
| Length ( $\text{\AA}$ )           | 1684.5   | $\pm$   | 4.9918    |
| Fractal Dimension                 | 1.4105   | $\pm$   | 0.0033411 |
| Fitting Range                     | 0.001072 | $< q <$ | 0.2154    |



## Sonicated Gel (403 min after homogenization)— Smearred Fractal Core-Shell Cylinder

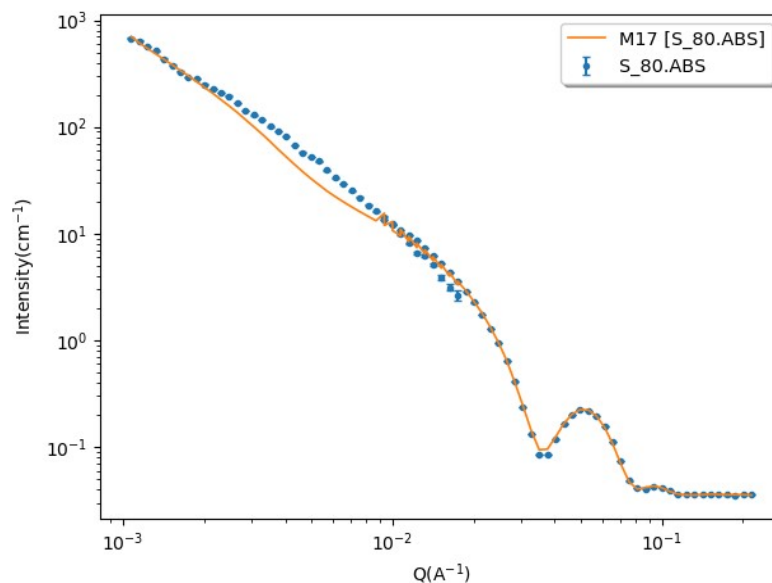

|                                   |          |         |           |
|-----------------------------------|----------|---------|-----------|
| Volume Fraction (scale)           | 0.010299 | $\pm$   | 7.20E-06  |
| Background ( $\text{cm}^{-1}$ )   | 0.035029 | $\pm$   | 2.23E-05  |
| Core SLD ( $\text{\AA}^{-2}$ )    | 3.16E-06 | $\pm$   | 0         |
| Shell SLD ( $\text{\AA}^{-2}$ )   | 1.62E-06 | $\pm$   | 0         |
| Solvent SLD ( $\text{\AA}^{-2}$ ) | 3.16E-06 | $\pm$   | 0         |
| Radius ( $\text{\AA}$ )           | 42.483   | $\pm$   | 0.017188  |
| Thickness ( $\text{\AA}$ )        | 50.439   | $\pm$   | 0.032972  |
| Thickness Polydispersity          | 0.034947 | $\pm$   | 0.0023811 |
| Length ( $\text{\AA}$ )           | 1674.5   | $\pm$   | 4.8191    |
| Fractal Dimension                 | 1.4153   | $\pm$   | 0.0033243 |
| Fitting Range                     | 0.001072 | $< q <$ | 0.2154    |

## Sonicated Gel (453 min after homogenization)— Smearred Fractal Core-Shell Cylinder

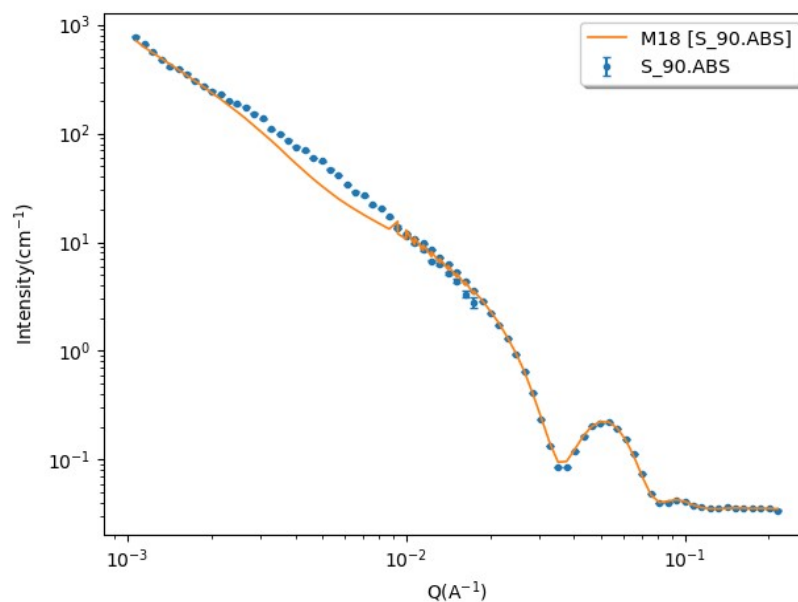

|                                |          |         |           |
|--------------------------------|----------|---------|-----------|
| Volume Fraction (scale)        | 0.010288 | ±       | 7.19E-06  |
| Background (cm <sup>-1</sup> ) | 0.034909 | ±       | 2.23E-05  |
| Core SLD (Å <sup>-2</sup> )    | 3.16E-06 | ±       | 0         |
| Shell SLD (Å <sup>-2</sup> )   | 1.62E-06 | ±       | 0         |
| Solvent SLD (Å <sup>-2</sup> ) | 3.16E-06 | ±       | 0         |
| Radius (Å)                     | 42.44    | ±       | 0.017675  |
| Thickness (Å)                  | 50.492   | ±       | 0.033431  |
| Thickness Polydispersity       | 0.049002 | ±       | 0.0017507 |
| Length (Å)                     | 1677.9   | ±       | 4.8712    |
| Fractal Dimension              | 1.4259   | ±       | 0.0033087 |
| Fitting Range                  | 0.001072 | < $q$ < | 0.2154    |

## Sonicated Gel (478 min after homogenization)— Smearred Fractal Core-Shell Cylinder

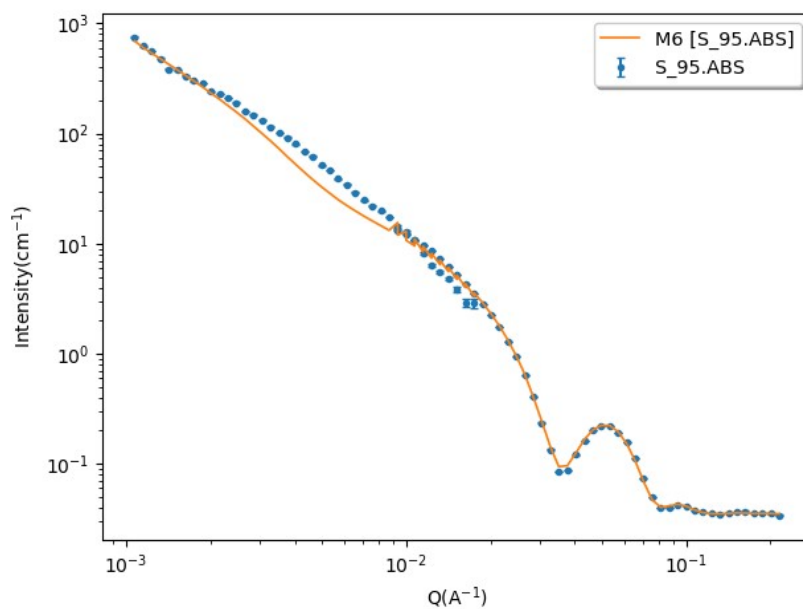

|                                |          |              |           |
|--------------------------------|----------|--------------|-----------|
| Volume Fraction (scale)        | 0.010346 | ±            | 7.27E-06  |
| Background (cm <sup>-1</sup> ) | 0.034868 | ±            | 2.23E-05  |
| Core SLD (Å <sup>-2</sup> )    | 3.16E-06 | ±            | 0         |
| Shell SLD (Å <sup>-2</sup> )   | 1.62E-06 | ±            | 0         |
| Solvent SLD (Å <sup>-2</sup> ) | 3.16E-06 | ±            | 0         |
| Radius (Å)                     | 42.562   | ±            | 0.017907  |
| Thickness (Å)                  | 50.288   | ±            | 0.033507  |
| Thickness Polydispersity       | 0.044799 | ±            | 0.0019206 |
| Length (Å)                     | 1679.7   | ±            | 4.9258    |
| Fractal Dimension              | 1.4045   | ±            | 0.0033337 |
| Fitting Range                  | 0.001072 | < <i>q</i> < | 0.2154    |
